# Supplementary material for: Construction of plasmonic 1T-WS2/2H-WS2/CdS heterostructures for enhanced solar driven hydrogen evolution
Source: Royal Society of Chemistry journal article supplement (doi:10.1039/d2ta07140a), 2022-01-01
Supplement: d2ta07140a1.pdf [file d2ta07140a1.pdf]

## Electronic Supplementary Information

### **Construction of plasmonic 1T-WS<sub>2</sub>/2H-WS<sub>2</sub>/CdS heterostructures for enhanced solar driven hydrogen evolution**

Xiaoyu Chen, Zhi Han, Bin Zhang\*, Bojing Sun, Yu Wang, Yunchen Du, Xijiang Han\*, and Ping Xu\*

MIIT Key Laboratory of Critical Materials Technology for New Energy Conversion and Storage, School of Chemistry and Chemical Engineering, Harbin Institute of Technology, Harbin 150001, China

Email: pxu@hit.edu.cn (P.X.); zhangbin\_hit@aliyun.com; hanxijiang@hit.edu.cn (X.H.)

## Contents

- Fig. S1** PerfectLight Labsolar 6A and PerfectLight PLS-SXE300/300UV.
- Fig. S2** Optical images of pure CdS nanorods, 1T-WS<sub>2</sub>/2H-WS<sub>2</sub>/CdS heterostructures (WWC-1-6), and pure WS<sub>2</sub> nanosheets.
- Fig. S3** TG curves of pure CdS nanorods under N<sub>2</sub> atmosphere.
- Fig. S4** XRD patterns of different 1T-WS<sub>2</sub>/2H-WS<sub>2</sub>/CdS heterostructures, CdS-W, CdS-CN, and pure CdS nanorods.
- Fig. S5** Raman spectra of different 1T-WS<sub>2</sub>/2H-WS<sub>2</sub>/CdS heterostructures, CdS-W, CdS-CN, and pure CdS nanorods.
- Fig. S6** Nitrogen sorption isotherms, BET surface areas, and pore volumes of pure WS<sub>2</sub> nanosheets.
- Fig. S7** TEM and HRTEM images of pure CdS nanorods.
- Fig. S8** TEM and the corresponding EDX mapping images of CdS-W heterostructures.
- Fig. S9** HRTEM images of pure WS<sub>2</sub> nanosheets.
- Fig. S10** Comparison diagram of Cd 3d, S 2p, and W 4f of WWC-3-6 heterostructures.
- Fig. S11** Comparison diagram of Cd 3d, S 2p, and W 4f of CdS-W heterostructures.
- Fig. S12** (a) N 1s and (b) C 1s XPS spectra of WWC-1-6 heterostructures.
- Fig. S13** EPR spectra of 1T-WS<sub>2</sub>/2H-WS<sub>2</sub>/CdS heterostructures (WWC-1-6) and CdS-W.
- Fig. S14** Optical bandgaps of WWC-1-6 heterostructures and pure CdS nanorods.
- Fig. S15** UV-visible absorption spectrum and optical bandgap of pure WS<sub>2</sub> nanosheets.
- Fig. S16** H<sub>2</sub> evolution rates of different catalysts and 1T-WS<sub>2</sub>/2H-WS<sub>2</sub>/CdS heterostructures.
- Fig. S17** The highest temperature of photocatalytic system with (a) pure CdS and (b) WWC-1-6 as photocatalysts without cooling water.
- Fig. S18** XY, XZ, YZ direction and 3D modeling of FDTD simulation diagram of WS<sub>2</sub> nanosheets.
- Fig. S19** XY, XZ, YZ direction and 3D modeling of FDTD simulation diagram of CdS nanorods.
- Fig. S20** XY, XZ, YZ direction and 3D modeling of FDTD simulation diagram of 1T-WS<sub>2</sub>/2H-WS<sub>2</sub>/CdS heterostructures.
- Fig. S21** Theoretically calculated bandgap of (a) CdS, (b) 2H-WS<sub>2</sub>, and (c) 1T-WS<sub>2</sub>.
- Table. S1** Specific dosage and the corresponding sample designations.
- Table. S2** Quantitative analyses of the fitted XPS peaks of 1T-WS<sub>2</sub> and 2H-WS<sub>2</sub>.
- Table. S3** Photocatalytic hydrogen production performance of photocatalysts reported in literatures.
- Table. S4** Carrier densities of pure CdS and 1T-WS<sub>2</sub>/2H-WS<sub>2</sub>/CdS heterostructures (WWC-1-6 and WWC-3-6).

**Table.** Time-resolved PL decay curve parameters obtained by double-exponential function simulation  
**S5**

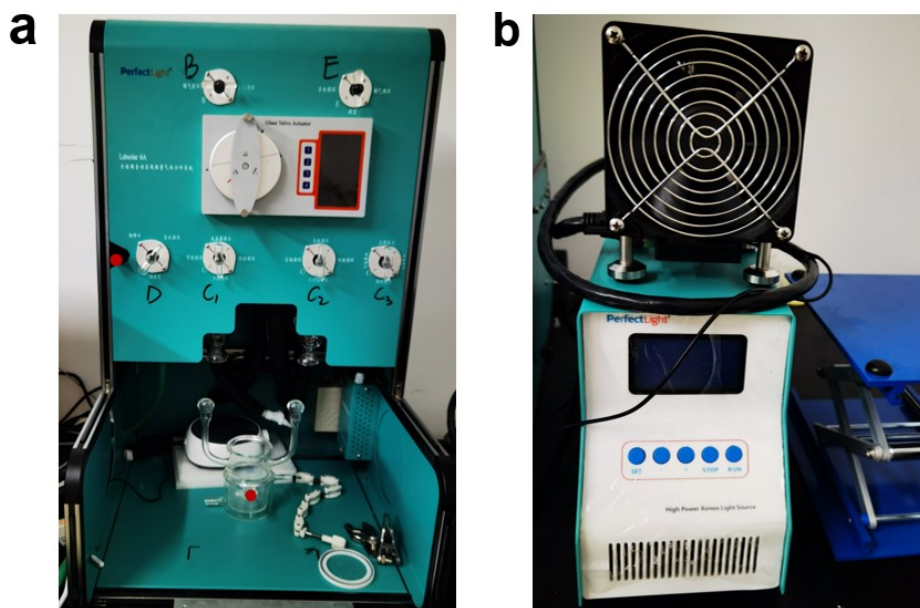

**Fig. S1.** (a) PerfectLight Labsolar 6A and (b) PerfectLight PLS-SXE300/300UV.

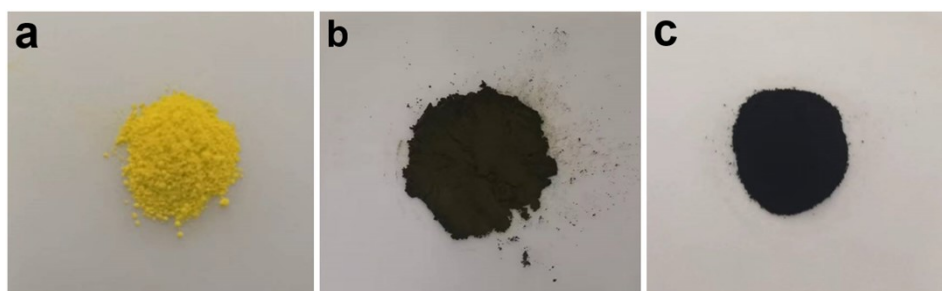

**Fig. S2.** Optical images of (a) pure CdS nanorods, (b) 1T-WS<sub>2</sub>/2H-WS<sub>2</sub>/CdS heterostructures (WWC-1-6), and (c) pure WS<sub>2</sub> nanosheets.

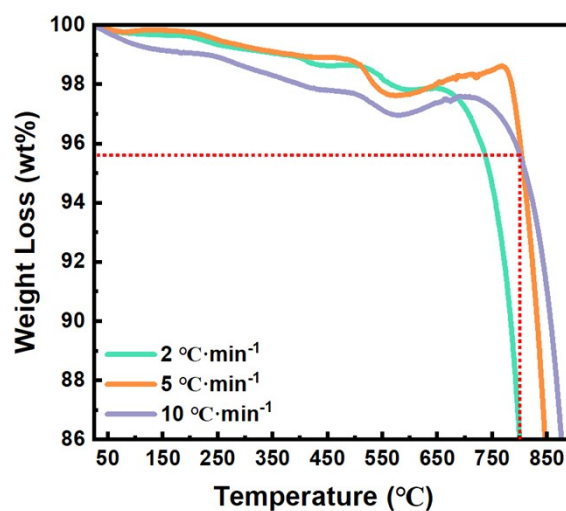

**Fig. S3.** TG curves of pure CdS nanorods under N<sub>2</sub> atmosphere.

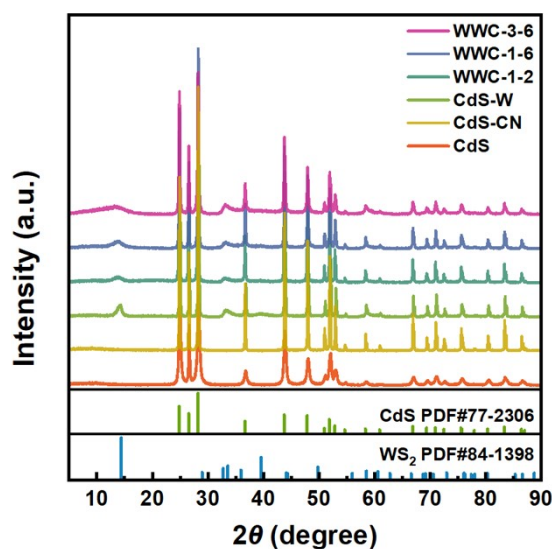

**Fig. S4.** XRD patterns of different 1T-WS<sub>2</sub>/2H-WS<sub>2</sub>/CdS heterostructures (WWC-3-6, WWC-1-6, WWC-3-2), CdS-W (CdS-W represents only calcination the mixture of CdS and H<sub>28</sub>N<sub>6</sub>O<sub>41</sub>W<sub>12</sub>·H<sub>2</sub>O after grinding), CdS-CN (CdS-CN represents only calcination the mixture of CdS and C<sub>2</sub>H<sub>4</sub>N<sub>4</sub> after grinding), and pure CdS nanorods.

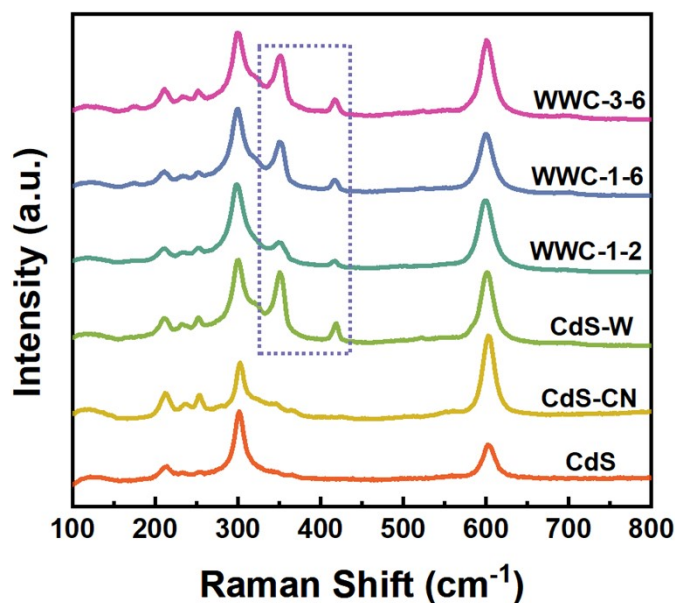

**Fig. S5.** Raman spectra of different 1T-WS<sub>2</sub>/2H-WS<sub>2</sub>/CdS heterostructures (WWC-3-6, WWC-1-6, WWC-1-2), CdS-W (CdS-W represents only calcination the mixture of CdS and H<sub>28</sub>N<sub>6</sub>O<sub>41</sub>W<sub>12</sub>·H<sub>2</sub>O after grinding), CdS-CN (CdS-CN represents only calcination the mixture of CdS and C<sub>2</sub>H<sub>4</sub>N<sub>4</sub> after grinding), and pure CdS nanorods.

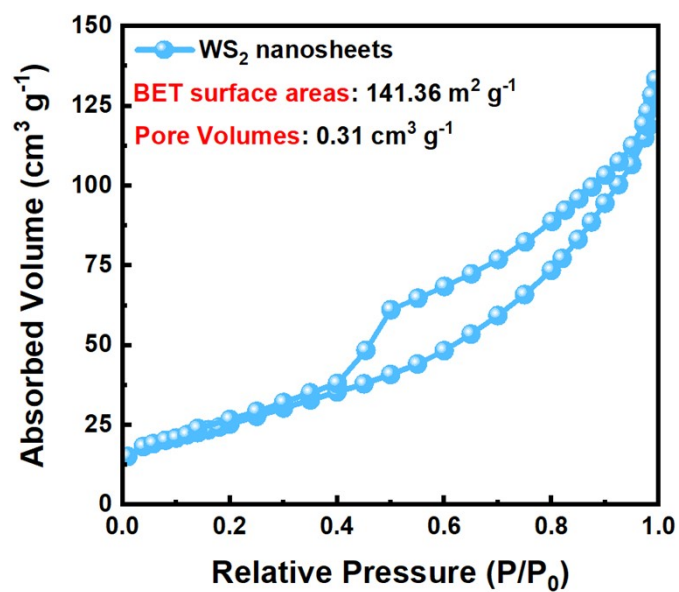

**Fig. S6.** Nitrogen sorption isotherms, BET surface areas, and pore volumes of pure WS<sub>2</sub> nanosheets.

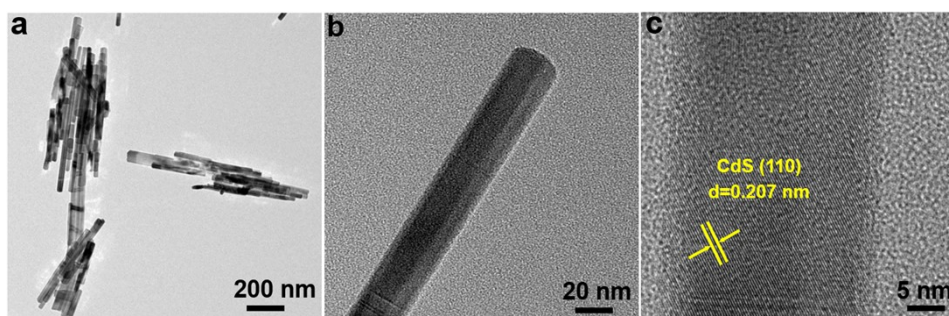

**Fig. S7.** TEM and HRTEM images of pure CdS nanorods.

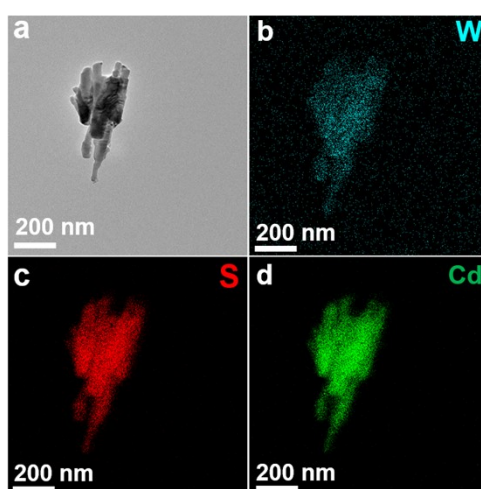

**Fig. S8.** TEM and the corresponding EDX mapping images of CdS-W heterostructures (CdS-W represents only calcination the mixture of CdS and H<sub>28</sub>N<sub>6</sub>O<sub>41</sub>W<sub>12</sub>·H<sub>2</sub>O after grinding).

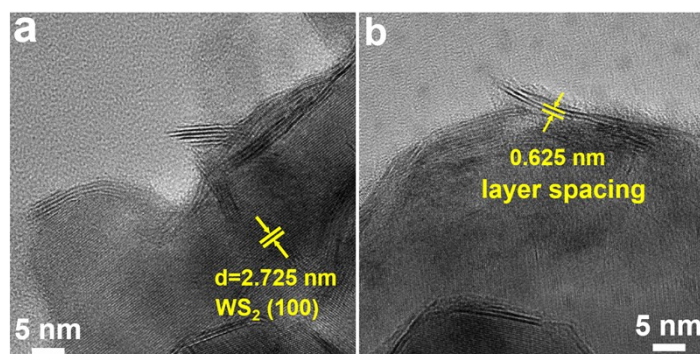

**Fig. S9.** HRTEM images of pure WS<sub>2</sub> nanosheets.

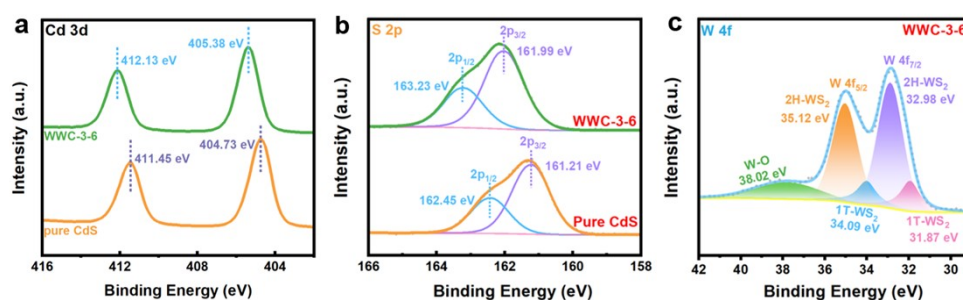

**Fig. S10.** Comparison diagram of (a) Cd 3d, (b) S 2p, and (c) W 4f of 1T-WS<sub>2</sub>/2H-WS<sub>2</sub>/CdS heterostructures (WWC-3-6).

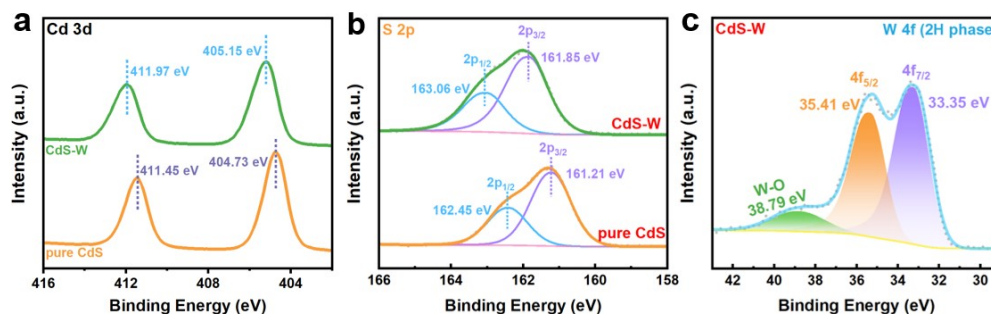

**Fig. S11.** Comparison diagram of (a) Cd 3d, (b) S 2p, and (c) W 4f of CdS-W heterostructures (CdS-W represents only calcination the mixture of CdS and H<sub>28</sub>N<sub>6</sub>O<sub>41</sub>W<sub>12</sub>·H<sub>2</sub>O after grinding).

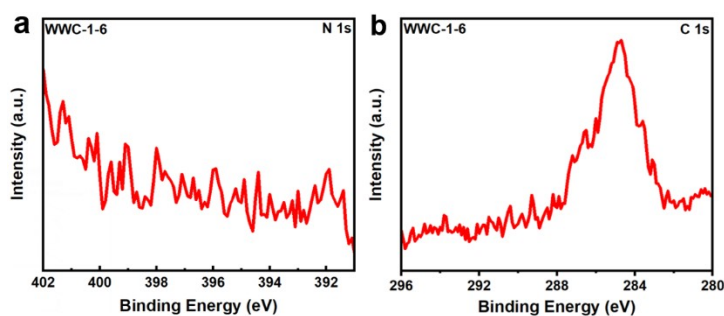

**Fig. S12.** (a) N 1s and (b) C 1s XPS spectra of WWC-1-6 heterostructures.



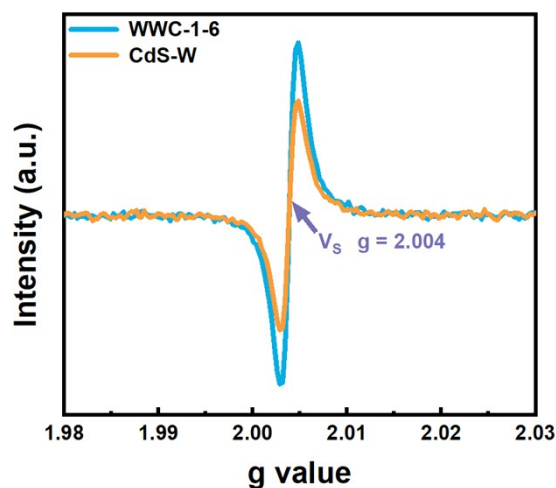

**Fig. S13.** EPR spectra of 1T-WS<sub>2</sub>/2H-WS<sub>2</sub>/CdS heterostructures (WWC-1-6) and CdS-W (CdS-W represents only calcination the mixture of CdS and H<sub>28</sub>N<sub>6</sub>O<sub>41</sub>W<sub>12</sub>·H<sub>2</sub>O after grinding).

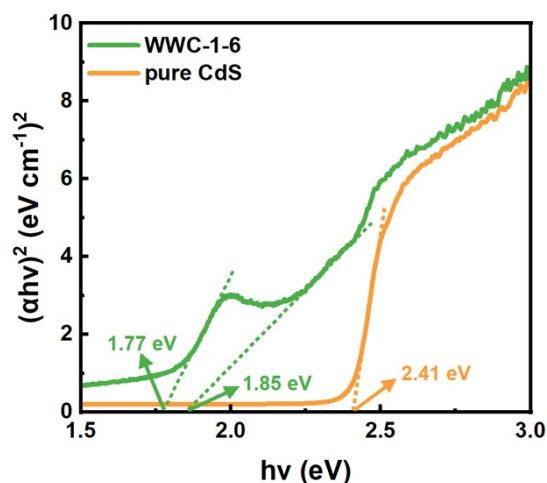

**Fig. S14.** Optical bandgaps of 1T-WS<sub>2</sub>/2H-WS<sub>2</sub>/CdS heterostructures (WWC-1-6) and pure CdS nanorods.

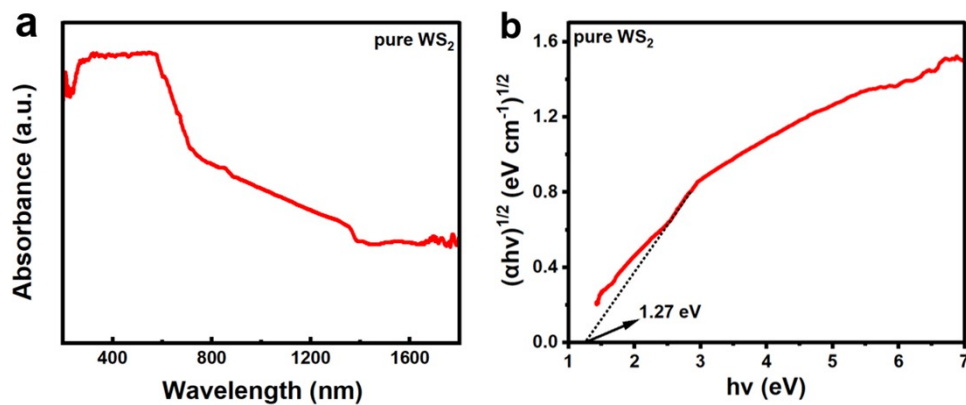

**Fig. S15.** (a) Ultraviolet-visible absorption spectrum and (b) optical bandgap of pure WS<sub>2</sub> nanosheets.

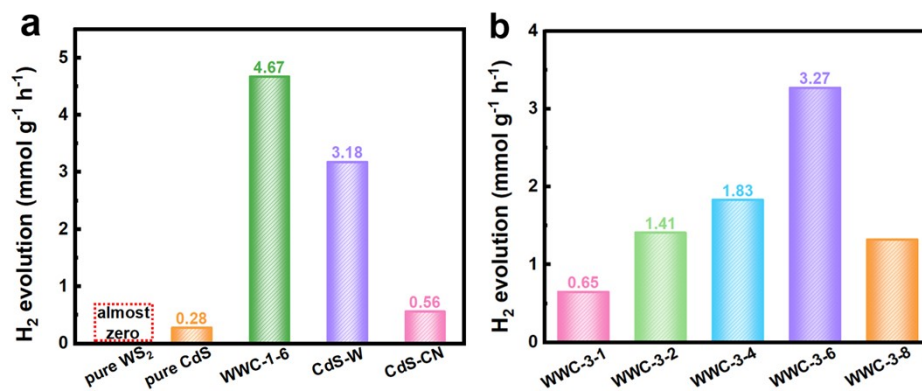

**Fig. S16.** H<sub>2</sub> evolution rates of (a) different catalysts and (b) 1T-WS<sub>2</sub>/2H-WS<sub>2</sub>/CdS heterostructures (WWC-3-1, WWC-3-2, WWC-3-4, WWC-3-6, WWC-3-8).

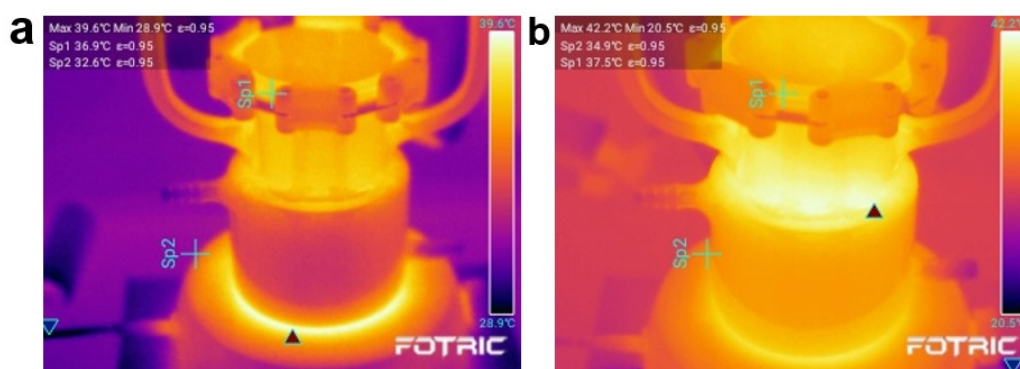

**Fig. S17.** The highest temperature of photocatalytic system with (a) pure CdS and (b) WWC-1-6 as photocatalysts without cooling water.

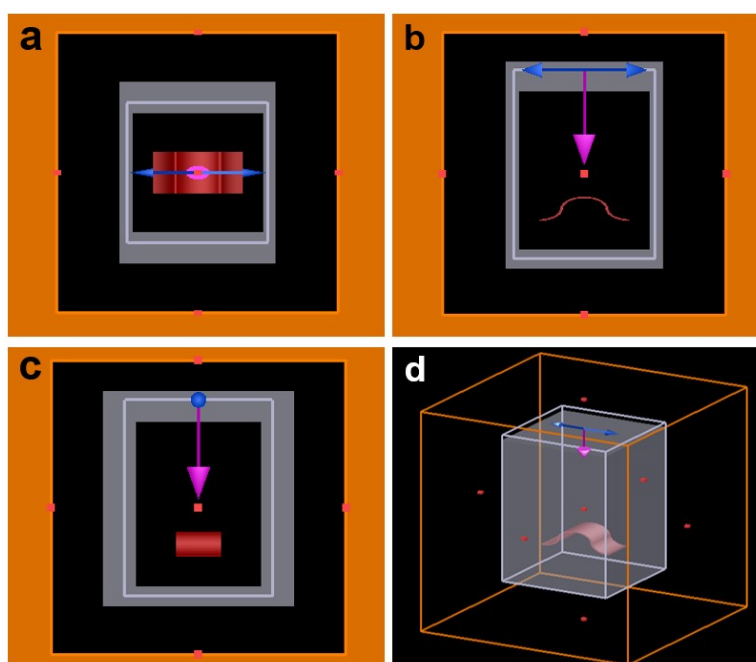

**Fig. S18.** (a) XY direction, (b) XZ direction, (c) YZ direction, and (d) 3D modeling of FDTD simulation diagram of WS<sub>2</sub> nanosheets.



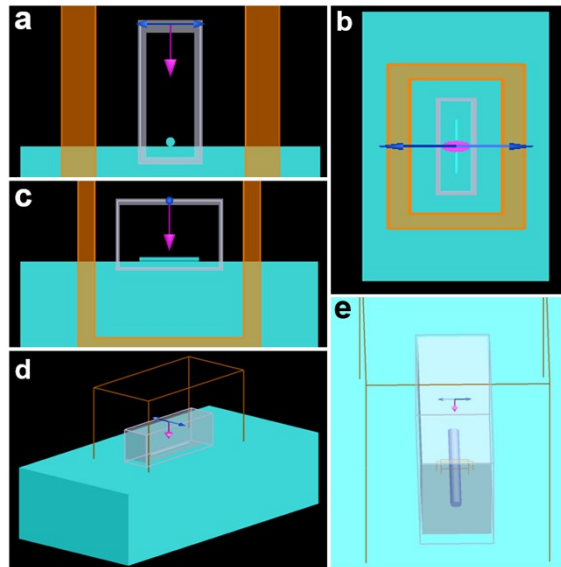

**Fig. S19.** (a) XZ direction, (b) XY direction, (c) YZ direction, and (d, e) 3D modeling of FDTD simulation diagram of CdS nanorods.

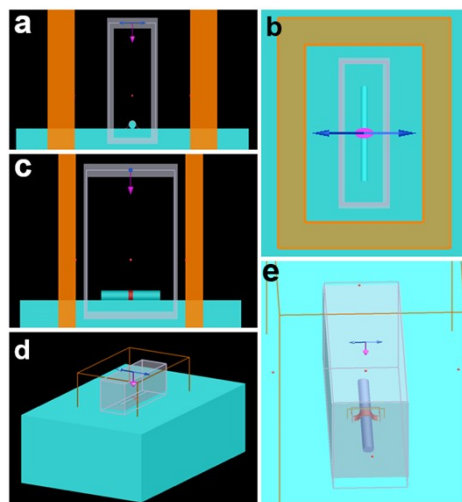

**Fig. S20.** (a) XZ direction, (b) XY direction, (c) YZ direction, and (d, e) 3D modeling of FDTD simulation diagram of 1T-WS<sub>2</sub>/2H-WS<sub>2</sub>/CdS heterostructures.

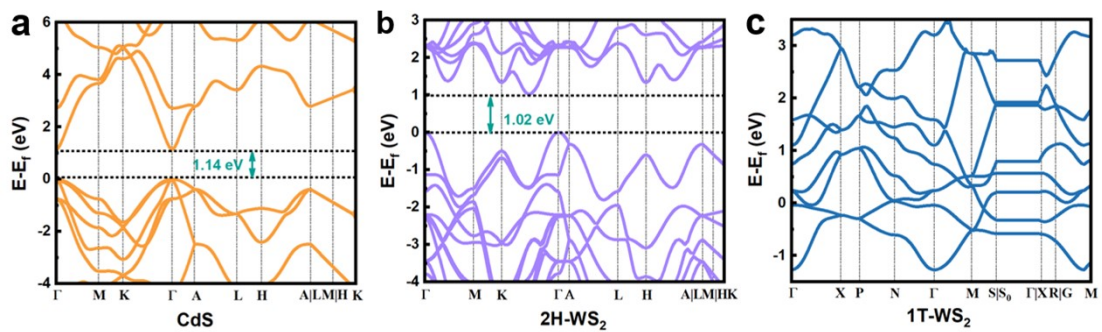

**Fig. S21.** Theoretically calculated bandgap of (a) CdS, (b) 2H-WS<sub>2</sub>, and (c) 1T-WS<sub>2</sub>.

**Table S1.** Specific dosage and the corresponding sample designations.

| The mass ratio | H <sub>28</sub> N <sub>6</sub> O <sub>41</sub> W <sub>12</sub> ·H <sub>2</sub> O | C <sub>2</sub> H <sub>4</sub> N <sub>4</sub> | sample designations |
|----------------|----------------------------------------------------------------------------------|----------------------------------------------|---------------------|
| 1:1            | 0.01 g                                                                           | 0.01 g                                       | WWC-1-1             |
|                | 0.02 g                                                                           | 0.02 g                                       | WWC-1-2             |
|                | 0.04 g                                                                           | 0.04 g                                       | WWC-1-4             |
|                | 0.06 g                                                                           | 0.06 g                                       | WWC-1-6             |
|                | 0.08 g                                                                           | 0.08 g                                       | WWC-1-8             |
| 1:3            | 0.01 g                                                                           | 0.03 g                                       | WWC-3-1             |
|                | 0.02 g                                                                           | 0.06 g                                       | WWC-3-2             |
|                | 0.04 g                                                                           | 0.12 g                                       | WWC-3-4             |
|                | 0.06 g                                                                           | 0.18 g                                       | WWC-3-6             |
|                | 0.08 g                                                                           | 0.24 g                                       | WWC-3-8             |

**Table S2.** Quantitative analyses of the fitted XPS peaks of 1T-WS<sub>2</sub> and 2H-WS<sub>2</sub>.

|         |          |               |          |          |
|---------|----------|---------------|----------|----------|
| WWC-1-6 | 2H phase | Peaks BE (eV) | 35.02    | 32.66    |
|         |          | Area          | 10787.43 | 13683.78 |
|         | 1T phase | Peaks BE (eV) | 34.18    | 31.95    |
|         |          | Area          | 6930.8   | 8791.84  |
| WWC-3-6 | 2H phase | Peaks BE (eV) | 35.12    | 32.98    |
|         |          | Area          | 11220.54 | 14265.61 |
|         | 1T phase | Peaks BE (eV) | 34.09    | 31.87    |
|         |          | Area          | 2844.80  | 3573.97  |

For WWC-1-6:

$$[1T]\% = \frac{[1T]}{[1T] + [2H]} \times 100\% = \frac{15722.64}{15722.64 + 24471.21} \times 100\% = 39.12\%$$

For WWC-3-6:

$$[1T]\% = \frac{[1T]}{[1T] + [2H]} \times 100\% = \frac{6418.77}{6418.77 + 25486.15} \times 100\% = 20.11\%$$

**Table S3.** Photocatalytic hydrogen production performance of photocatalysts reported in literatures.

| Photocatalysts                                        | H <sub>2</sub> (mmol/g/h) | Illumination                          | Sacrificial agent                                                         | Ref.                 |
|-------------------------------------------------------|---------------------------|---------------------------------------|---------------------------------------------------------------------------|----------------------|
| CdS/g-C <sub>3</sub> N <sub>4</sub>                   | 0.392                     | 3 W LED<br>(full spectrum)            | 20% CH <sub>3</sub> OH                                                    | 1                    |
| CdS/TiO <sub>2</sub>                                  | 1.5                       | 300 W Xe lamp<br>(>420 nm)            | 0.5 M Na <sub>2</sub> S and<br>0.5 M Na <sub>2</sub> SO <sub>3</sub>      | 2                    |
| CdS/Ti <sub>3</sub> C <sub>2</sub>                    | 2.407                     | 300 W Xe lamp<br>(>420 nm)            | 10 wt% lactic acid<br>solution                                            | 3                    |
| CdS/g-C <sub>3</sub> N <sub>4</sub>                   | 4.15                      | 300 W Xe lamp<br>(>400 nm)            | 0.35 M Na <sub>2</sub> S and<br>0.25 M Na <sub>2</sub> SO <sub>3</sub>    | 4                    |
| CdS/Ti <sup>3+</sup> /N-TiO <sub>2</sub>              | 1.118                     | 300 W Xe lamp<br>(>420 nm)            | 0.35 M Na <sub>2</sub> S and<br>0.25 M Na <sub>2</sub> SO <sub>3</sub>    | 5                    |
| CdS/Cu <sub>2</sub> O/g-C <sub>3</sub> N <sub>4</sub> | 1.84                      | 300 W Xe lamp<br>(AM 1.5G)            | 20% CH <sub>3</sub> OH                                                    | 6                    |
| NiS/CdS                                               | 2.18                      | 300 W Xe lamp<br>(>420 nm)            | 0.35 M Na <sub>2</sub> S and<br>0.25 M Na <sub>2</sub> SO <sub>3</sub>    | 7                    |
| NiS/CdS                                               | 0.15                      | 300 W Xe lamp<br>(>420 nm)            | 10 wt% lactic acid<br>solution                                            | 8                    |
| CdS/g-C <sub>3</sub> N <sub>4</sub> /CuS              | 1.15                      | 300 W Xe lamp<br>(>420 nm)            | 0.35 M Na <sub>2</sub> S and<br>0.25 M Na <sub>2</sub> SO <sub>3</sub>    | 9                    |
| CdS/Co-MoS <sub>x</sub>                               | 0.54                      | 300 W Xe lamp<br>(>420 nm)            | 10 wt% lactic acid<br>solution                                            | 10                   |
| <b>1T-WS<sub>2</sub>/2H-<br/>WS<sub>2</sub>/CdS</b>   | <b>4.67</b>               | <b>300 W Xe lamp<br/>(&gt;420 nm)</b> | <b>0.35 M Na<sub>2</sub>S and<br/>0.25 M Na<sub>2</sub>SO<sub>3</sub></b> | <b>This<br/>work</b> |

**Table S4.** Carrier densities of pure CdS and 1T-WS<sub>2</sub>/2H-WS<sub>2</sub>/CdS heterostructures (WWC-1-6 and WWC-3-6).

| Samples  | Carrier density cm <sup>-3</sup> |
|----------|----------------------------------|
| pure CdS | 7.16×10 <sup>18</sup>            |
| WWC-1-6  | 1.78×10 <sup>19</sup>            |
| WWC-3-6  | 1.45×10 <sup>19</sup>            |

**Table S5.** Time-resolved PL decay curve parameters obtained by double-exponential function simulation.

| Samples              | τ <sub>1</sub> (ns) | τ <sub>2</sub> (ns) | A <sub>1</sub> (%) | A <sub>2</sub> (%) | τ <sub>av</sub> (ns) |
|----------------------|---------------------|---------------------|--------------------|--------------------|----------------------|
| pure CdS             | 1.12                | 10.13               | 66.22              | 33.78              | 4.16                 |
| pure WS <sub>2</sub> | 1.52                | 17.61               | 64.52              | 35.48              | 7.23                 |
| WWC-1-6              | 1.38                | 12.13               | 63.93              | 36.07              | 5.25                 |

## REFERENCES

1. Z. Li, L. Zhang, Y. Liu, C. Shao, Y. Gao, F. Fan, J. Wang, J. Li, J. Yan, R. Li and C. Li, Surface-Polarity-Induced Spatial Charge Separation Boosts Photocatalytic Overall Water Splitting on GaN Nanorod Arrays, *Angew. Chem. Int. Ed.*, 2020, **132**, 945-952.
2. Z. Jiang, K. Qian, C. Zhu, H. Sun, W. Wan, J. Xie, H. Li, K. Wong and S. Yuan, Carbon nitride coupled with CdS-TiO<sub>2</sub> nanodots as 2D/0D ternary composite with enhanced photocatalytic H<sub>2</sub> evolution: a novel efficient three-level electron transfer process, *Appl. Catal. B*, 2017, **210**, 194-204.
3. R. Xiao, C. Zhao, Z. Zou, Z. Chen, L. Tian, H. Xu, H. Tang, Q. Liu, Z. Lin and X. Yang, In situ fabrication of 1D CdS nanorod/2D Ti<sub>3</sub>C<sub>2</sub> MXene nanosheet Schottky heterojunction toward enhanced photocatalytic hydrogen evolution, *Appl. Catal. B*, 2020, **268**, 118382.
4. J. Zhang, Y. Wang, J. Jin, J. Zhang, Z. Lin, F. Huang and J. Yu, Efficient visible-light photocatalytic hydrogen evolution and enhanced photostability of core/shell CdS/g-C<sub>3</sub>N<sub>4</sub> nanowires, *ACS Appl. Mater. Interfaces*, 2013, **5**, 10317-10324.
5. Y. Qin, H. Li, J. Lu, F. Meng, C. Ma, Y. Yan and M. Meng, Nitrogen-doped hydrogenated TiO<sub>2</sub> modified with CdS nanorods with enhanced optical absorption, charge separation and photocatalytic hydrogen evolution, *Chem. Eng. J.*, 2020, **384**, 123275.
6. F. Nekouei, S. Nekouei, M. Pouzesh and Y. Liu, Porous-CdS/Cu<sub>2</sub>O/graphitic-C<sub>3</sub>N<sub>4</sub> dual pn junctions as highly efficient photo/catalysts for degrading ciprofloxacin and generating hydrogen using solar energy, *Chem. Eng. J.*, 2020, **385**, 123710.
7. W. Zhang, Y. Wang, Z. Wang, Z. Zhong and R. Xu, Highly efficient and noble metal-free NiS/CdS photocatalysts for H<sub>2</sub> evolution from lactic acid sacrificial solution under visible light, *ChemComm*, 2010, **46**, 7631-7633.
8. C. Li, H. Wang, S. Naghadeh, Z. Zhang and P. Fang, Visible light driven hydrogen evolution by photocatalytic reforming of lignin and lactic acid using one-dimensional NiS/CdS nanostructures, *Appl. Catal. B*, 2018, **227**, 229-239.
9. F. Cheng, H. Yin and Xiang Q, Low-temperature solid-state preparation of ternary CdS/g-C<sub>3</sub>N<sub>4</sub>/CuS nanocomposites for enhanced visible-light photocatalytic H<sub>2</sub>-production activity, *Appl. Surf. Sci.*, 2017, **391**, 432-439.
10. Y. Lei, J. Hou, F. Wang, X. Ma, Z. Jin, J. Xu and S. Min, Boosting the catalytic performance of MoS<sub>x</sub> cocatalysts over CdS nanoparticles for photocatalytic H<sub>2</sub> evolution by Co doping via a facile photochemical route, *Appl. Surf. Sci.*, 2017, **420**, 456-464.
